# Supplementary material
Source: publisher site journal article supplement (https://www.dovepress.com/article/436747)
Supplement: Supplementary file 1 [file get_supplementary_file.php]

**Additional file 1**

**Informed Consent and Notice**

Dear participants:

We cordially invite you to participate in a study titled "Feedback intervention model of Gradient Boosting Decision Tree (GBDT) technology on glucocorticoid prescription control in primary care institutions." This research project is funded by the Natural Science Foundation of Guizhou Province (Guizhou Science and Technology Foundation -ZK [2021] General 499). The trial was approved by the Human Trial Ethics Committee of Guizhou Medical University (Certificate No.: 2021 (249)) in October 28, 2021). Prior to making your decision on participation, we kindly request you to carefully read the following information which aims to provide a comprehensive understanding of the study objectives, procedures, duration, potential benefits, risks as well as any possible discomfort associated with participation. You are welcome to discuss this matter with your family and friends or seek assistance from our staff members who will be pleased to address any queries or concerns you may have.

**Background and Objectives of the Research**

**The current status of disease burden and treatment: assessing the situation and impact of glucocorticoid misuse.**

Glucocorticoids (GCs) are the pivotal regulatory hormones in the body's stress response, exerting anti-inflammatory, antitoxic, anti-shock, and immunosuppressive effects. However, prolonged and high-dose usage can exacerbate diseases and prolong their course. It not only leads to secondary osteoporosis and gastrointestinal bleeding or perforation but also imposes an increased medical burden. During the SARS outbreak, patients who received short-term heavy doses of glucocorticoids often experienced these aforementioned complications. In both the United States and the United Kingdom, over 30% of individuals without any underlying conditions undergo systemic glucocorticoid therapy; many patients are exposed to glucocorticoids for weeks or even months in primary care settings resulting in complication rates that are 60% higher than those observed in placebo groups. According to reports, 87.3 percent of doctors working at primary healthcare institutions in China tend to prescribe antibiotics and hormones for fever treatment while 58.4 percent frequently employ kinin for upper respiratory tract infections. Nevertheless, hormone use during general infectious diseases should strictly adhere to drug indications by employing low dosages and short courses of treatment; however, it is inappropriate to administer hormones when dealing with bacteria-, fungi-, or unknown etiology-related drug-resistant bacteria.

**Research purpose**

The aim of this study is to conduct a comprehensive big data analysis on the prescription of glucocorticoids for infectious diseases in Guizhou, utilizing artificial intelligence technology. By employing gradient boosting tree algorithms, we can develop an innovative a real-time pop-up warning of inappropriate glucocorticoid prescriptions based on the Hospital Information System. This intelligent system will facilitate intelligent and rational interventions by primary healthcare practitioners, while continuously learning and refining itself to enhance the clinical medication guidance program for glucocorticoids. Ultimately, our research aims to provide an economical, feasible, and effective reference program to address the issue of excessive glucocorticoid prescription in rural areas and alleviate the financial burden on public finance and individual farmers.

**Who should not participate in the study:**

(1) Physicians who refuse to intervene.

(2) Those working in primary care institutions for less than 6 months and during the intervention period, or those who may leave or be absent for an extended period to train other physicians.

(3) Physicians without prescribing privileges.

**What will I need to do if I participate in the study?**

1. Before enrolling you in the study, the researchers will request and document your basic information. As a qualified participant, you have the option to volunteer for participation and sign the informed consent form. If you choose not to participate, we will respect your decision without any interference.
2. If you decide to volunteer for this study, the following steps will be taken: Whenever you prescribe glucocorticoids during the intervention period, a pop-up warning may appear in your system alerting against inappropriate use or overprescribing of these medications. Simultaneously, this pop-up window will provide guidance on rational glucocorticoid usage for your reference. Additionally, every 10 days, our HIS system will automatically display information regarding your glucocorticoid prescriptions over that period of time including prescription rate, ranking among other prescriptions, and drug class details. Please note that all of your prescription data will be strictly confidential and it is entirely up to you whether or not to review it; furthermore, you can freely choose to close the pop-up window at any time.
3. Other aspects requiring your cooperation include providing basic information such as age, gender,title/position held at work,years of professional experience,and educational background. Your provided information will solely be utilized for this study. Our findings will be publicly published. Additionally,you will receive an electronic questionnaire upon completion of the trial aimed at assessing your attitude towards the intervention.

**Possible benefits of participating in the study:**

By participating in the study, you will incur no losses and face no risks associated with the prescription of a glucocorticoid medication. Gain access to diagnostic tips or recommendations from theHospital Information System , which can assist you in making well-informed decisions. Simultaneously enhance your knowledge and reinforce newly acquired information. Facilitate appropriate utilization of drugs.

**Possible adverse effects, risks, and discomfort associated with study participation:**

The present study does not entail any discernible or prospective hazards to you.

**The associated costs:**

The research will be conducted at no cost.

**Confidentiality of personal information:**

The confidentiality of your personal information and prescription details will be strictly maintained.

**If you require additional information:**

Please feel free to inquire at any time and we will provide corresponding answers. In the event that there are any significant updates during the study which may impact your willingness to continue participating, we will promptly notify you.

**The decision to participate in the study and withdraw from it is entirely voluntary.**

You have the option to decline participation or discontinue your involvement at any point during the study. Your decision to withdraw will not impact your relationship with the researcher or have any other consequences, such as loss of profit.

The current situation calls for our next course of action. Participation in the study is voluntary. Prior to making a decision to partake in this research, we kindly request that you engage with the staff and address any inquiries you may have. We appreciate your attention towards the aforementioned material. Should you choose to participate, please proceed by signing the informed consent form provided on the subsequent page. Additionally, kindly retain this information.

**Page for signature of consent**

**Project name:** Feedback intervention model of Gradient Boosting Decision Tree (GBDT) technology on glucocorticoid prescription control in primary care institutions.

**Project undertaking unit:** Guizhou Medical University

**Project collaborator:**The Second Affiliated Hospital of Guizhou University of Traditional Chinese Medicine, Guiyang Public Treatment Center, Guizhou University

**Project assignment number:** Guizhou Science and Technology Foundation -ZK [2021] General 499

**Declaration of consent**

The above introduction to this study has been thoroughly reviewed by me, and I have had the opportunity to engage in discussions with the researchers. All of my inquiries were addressed satisfactorily.I possess a comprehensive understanding of the potential risks and benefits associated with participating in this study. It is acknowledged that participation is entirely voluntary, and I hereby confirm my willingness to participate after careful consideration.

1. I can always seek additional information from the researchers.
2. I have the right to withdraw from the study at any time without facing discrimination or retaliation, ensuring that my rights and interests remain unaffected.
3. I provide consent for the research data to be reviewed by either the Human Trial Ethics Committee of Guizhou Medical University or a representative appointed by the sponsor.
4. A signed and dated copy of the informed consent will be provided to me.
5. Ultimately, I have decided to agree to participate in this study.

Participant signature:  Date:

Contact number:

The participants have been provided with a comprehensive explanation of the study, including its scope, potential benefits and risks. Additionally, they have each received a copy of their signed informed consent.

Researcher signature: Date:

Contact number:

**Additional file 2**

**The Project Implementation Agreement for the Primary Health Department of Guizhou Provincial Health Commission**

Party A: Primary Health Department of Guizhou Provincial Health Commission

Party B: School of Medicine and Health Management, Guizhou Medical University

Party C: Guizhou Lianke Weixin Technology Co., LTD.

Dr. Chang Yue, Director of the Department of Marketing at the School of Medical and Health Management, Guizhou Medical University, has provided support for the  National Natural Science Foundation of China Grant for "Research on feedback intervention mode of antibiotic prescription control in primary care institutions based on the depth graph neural network technology " as well as the Natural Science Foundation of Guizhou Province, “Feedback intervention model of Gradient Boosting Decision Tree (GBDT) technology on glucocorticoid prescription control in primary care institutions”. Party B and Party C will collaborate to ensure successful implementation of these projects. Party B is responsible for safeguarding data security in primary medical and health institutions within our province according to the terms outlined in the confidentiality agreement signed with Party A.

1. This Agreement shall become effective upon execution and authentication by the three parties.

2. This Agreement is executed in triplicate, with each party retaining one original copy.

Party A:

Primary Health Department of Guizhou Provincial Health Commission

Representative signature: Lei Wang

Date: December 4, 2020

Party B:

School of Medicine and Health Management, Guizhou Medical University

Representative signature: Lei Tang

Date: December 13, 2020

Party C:

Guizhou Lianke Weixin Technology Co., LTD.

Representative signature: Ruo Shi

Date: December 6, 2020
